# Supplementary material for: Association of HLA-G 3′UTR Polymorphisms with Response to First-Line FOLFIRI Treatment in Metastatic Colorectal Cancer
Source: MDPI journal article supplement (doi:10.3390/pharmaceutics14122737), 2022-12-07
Supplement: s1 [file s1]

Supplementary materials

# Association of *HLA-G* 3'UTR polymorphisms with response to first-line FOLFIRI treatment in metastatic colorectal cancer.

Lucia Scarabel <sup>1</sup>, Jerry Polesel <sup>2</sup>, Elena De Mattia <sup>1</sup>, Angela Buonadonna <sup>3</sup>, Mario Rosario D'Andrea <sup>4</sup>, Erika Cecchin <sup>1\*</sup> and Giuseppe Toffoli <sup>1</sup>

<sup>1</sup> Experimental and Clinical Pharmacology Unit, Centro di Riferimento Oncologico di Aviano (CRO) IRCCS, via Franco Gallini n. 2, 33081 Aviano, Italy

<sup>2</sup> Unit of Cancer Epidemiology, Centro di Riferimento Oncologico di Aviano (CRO) IRCCS, via Franco Gallini n. 2, 33081 Aviano, Italy

<sup>3</sup> Medical Oncology Unit, Centro di Riferimento Oncologico di Aviano (CRO) IRCCS, via Franco Gallini n. 2, 33081 Aviano, Italy

<sup>4</sup> Ospedale S. Paolo, Civitavecchia, Italy

\* Correspondence: Author contact info: Centro di Riferimento Oncologico (CRO) IRCCS, via Franco Gallini n. 2, 33081 Aviano, Italy, fax +39-(0)434-659799, email: ececchin@cro.it.

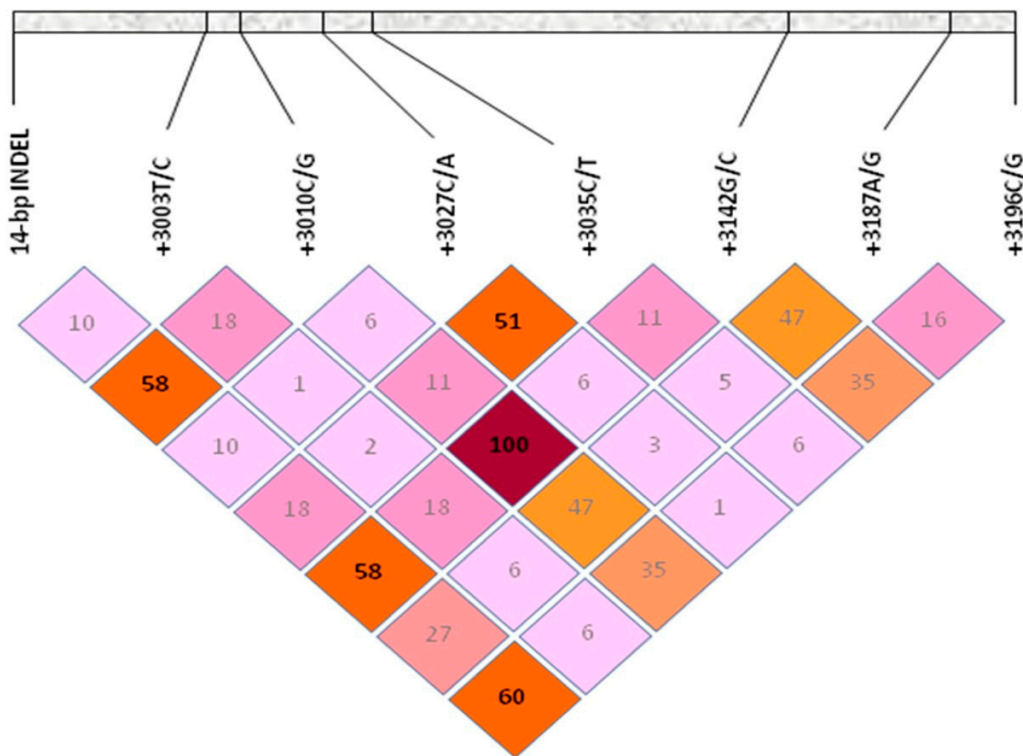

**Figure S1.** LD patterns at the 3'UTR region of *HLA-G* in 248 patients with mCRC. LD plot generated by LDPlotter shows correlations between all pairs of variants with MAF >2%. The  $r^2$  values (x100) for the marker pairs are listed in the corresponding boxes. High pairwise LD ( $r^2$ ) between variants is highlighted in bold.

**Table S1.** Distribution of polymorphisms and haplotypes of the *HLA-G* 3'UTR region. All selected polymorphisms had genotype distributions consistent with Hardy-Weinberg equilibrium assumptions.

|                                 | n   | (%)    | MAF   | HWE        |
|---------------------------------|-----|--------|-------|------------|
|                                 |     | 496    |       |            |
| +2960 14-bp INDEL (rs371194629) |     |        |       |            |
| Del/Del                         | 94  | (37.9) | 0.409 | $p=0.0501$ |
| Del/Ins                         | 105 | (42.3) |       |            |
| Ins/Ins                         | 49  | (19.8) |       |            |
| +3003 T>C (rs1707)              |     |        |       |            |
| TT                              | 189 | (76.2) | 0.131 | $p=0.3317$ |
| TC                              | 53  | (21.4) |       |            |
| CC                              | 6   | (2.4)  |       |            |
| +3010 C>G (rs1710) <sup>a</sup> |     |        |       |            |
| CC                              | 77  | (31.1) | 0.456 | $p=0.3686$ |
| CG                              | 116 | (46.8) |       |            |
| GG                              | 55  | (22.2) |       |            |
| +3027 C>A (rs17179101)          |     |        |       |            |
| CC                              | 216 | (87.1) | 0.065 | $p=0.2774$ |
| CA                              | 32  | (12.9) |       |            |
| +3035 C>T (rs17179108)          |     |        |       |            |
| CC                              | 194 | (78.2) | 0.119 | $p=0.3663$ |
| CT                              | 49  | (19.8) |       |            |
| TT                              | 5   | (2.0)  |       |            |
| +3187 A>G (rs9380142)           |     |        |       |            |
| AA                              | 126 | (50.8) | 0.282 | $p=0.5816$ |
| AG                              | 104 | (41.9) |       |            |
| GG                              | 18  | (7.3)  |       |            |
| +3196 C>G (rs1610696)           |     |        |       |            |
| CC                              | 120 | (48.4) | 0.294 | $p=0.2863$ |
| CG                              | 110 | (44.4) |       |            |
| GG                              | 18  | (7.3)  |       |            |
| Haplotype                       |     |        |       |            |
| UTR1/UTR1                       | 18  | (7.3)  |       |            |
| UTR1/UTR2                       | 46  | (18.6) |       |            |
| UTR1/UTR4                       | 20  | (8.1)  |       |            |
| UTR2/UTR2                       | 18  | (7.3)  |       |            |
| UTR2/UTR3                       | 16  | (6.5)  |       |            |
| UTR2/UTR5                       | 10  | (4.0)  |       |            |
| UTR2/UTR7                       | 16  | (6.5)  |       |            |
| UTR3/UTR1                       | 22  | (8.9)  |       |            |
| UTR4/UTR2                       | 17  | (6.9)  |       |            |
| Other                           | 65  | (26.2) |       |            |

<sup>a</sup>+3142 G>C (rs1063320) is in complete linkage disequilibrium with +3010.

Abbreviations: MAF: minor allele frequency; HWE: Hardy-Weinberg equilibrium.

**Table S2.** Frequency distributions of alleles and genotypes identified at *HLA-G* 3'UTR polymorphic sites of 248 patients with mCRC and comparison with those of 503 European (EUR) donors reported in 1000Genome Browser.

| <i>HLA-G</i> 3'UTR<br>Polymorphisms       | Genotypes | Our<br>population<br>n (%) | EUR<br>n (%) | Alleles | Our<br>population<br>n (%) | EUR<br>n (%) | Our<br>population vs.<br>EUR<br><i>p</i> -value* |
|-------------------------------------------|-----------|----------------------------|--------------|---------|----------------------------|--------------|--------------------------------------------------|
| <b>+2960 14-bp INDEL</b><br>(rs371194629) | Del/Del   | 94 (37.9)                  | 204 (40.6)   | Del     | 293 (59.1)                 | 638 (63.4)   | 0.1135                                           |
|                                           | Ins/Del   | 105 (42.3)                 | 230 (45.7)   | Ins     | 203 (40.9)                 | 368 (36.6)   |                                                  |
|                                           | Ins/Ins   | 49 (19.8)                  | 69 (13.7)    |         |                            |              |                                                  |
| <b>+3003 T&gt;C</b><br>(rs1707)           | T/T       | 189 (76.2)                 | 367 (73.0)   | T       | 431 (86.9)                 | 851 (84.6)   | 0.2454                                           |
|                                           | T/C       | 53 (21.4)                  | 117 (23.3)   | C       | 65 (13.1)                  | 155 (15.4)   |                                                  |
|                                           | C/C       | 6 (2.4)                    | 19 (3.8)     |         |                            |              |                                                  |
| <b>+3010 C&gt;G</b><br>(rs1710)           | C/C       | 77 (31.0)                  | 104 (20.7)   | C       | 268 (54.0)                 | 462 (45.9)   | <b>0.0036</b>                                    |
|                                           | G/C       | 114 (46.0)                 | 254 (50.5)   | G       | 228 (46.0)                 | 544 (54.1)   |                                                  |
|                                           | G/G       | 57 (23.0)                  | 145 (28.8)   |         |                            |              |                                                  |
| <b>+3027 C&gt;A</b><br>(rs17179101)       | C/C       | 216 (87.1)                 | 443 (88.1)   | C       | 464 (93.6)                 | 946 (94.0)   | 0.7319                                           |
|                                           | C/A       | 32 (12.9)                  | 60 (11.9)    | A       | 32 (6.4)                   | 60 (6.0)     |                                                  |
|                                           | A/A       | 0 (0.0)                    | 0 (0.0)      |         |                            |              |                                                  |
| <b>+3035 C&gt;T</b><br>(rs17179108)       | C/C       | 194 (78.2)                 | 412 (81.9)   | C       | 437 (88.1)                 | 913 (90.8)   | 0.1219                                           |
|                                           | C/T       | 49 (19.8)                  | 89 (17.7)    | T       | 59 (11.9)                  | 93 (9.2)     |                                                  |
|                                           | T/T       | 5 (2.0)                    | 2 (0.4)      |         |                            |              |                                                  |
| <b>+3142 G&gt;C</b><br>(rs1063320)        | G/G       | 77 (31.0)                  | 104 (20.7)   | G       | 270 (54.4)                 | 462 (45.9)   | <b>0.0021</b>                                    |
|                                           | G/C       | 116 (46.8)                 | 254 (50.5)   | C       | 226 (45.6)                 | 544 (54.1)   |                                                  |
|                                           | C/C       | 55 (22.2)                  | 145 (28.8)   |         |                            |              |                                                  |
| <b>+3187 A&gt;G</b><br>(rs9380142)        | A/A       | 126 (50.8)                 | 214 (42.5)   | A       | 355 (71.6)                 | 660 (65.6)   | <b>0.0222</b>                                    |
|                                           | A/G       | 103 (41.5)                 | 232 (46.1)   | G       | 141 (28.4)                 | 346 (34.4)   |                                                  |
|                                           | G/G       | 19 (7.7)                   | 57 (11.3)    |         |                            |              |                                                  |
| <b>+3196 C&gt;G</b><br>(rs1610696)        | C/C       | 120 (48.4)                 | 263 (52.3)   | C       | 350 (70.6)                 | 728 (72.4)   | 0.4653                                           |
|                                           | C/G       | 110 (44.3)                 | 202 (40.2)   | G       | 146 (29.4)                 | 278 (27.6)   |                                                  |
|                                           | G/G       | 18 (7.3)                   | 38 (7.6)     |         |                            |              |                                                  |
| <b>+3227 G&gt;A</b><br>(rs1233331)        | G/G       | 238 (96.0)                 | 468 (93.0)   | G       | 485 (97.8)                 | 970 (96.4)   | 0.2066                                           |
|                                           | G/A       | 9 (3.6)                    | 34 (6.8)     | A       | 11 (2.2)                   | 36 (3.6)     |                                                  |
|                                           | A/A       | 1 (0.4)                    | 1 (0.2)      |         |                            |              |                                                  |

\*calculated with two-sided Fisher's exact test.

**Table S3.** Univariate hazard ratio (HR) and corresponding 95% confidence intervals (CI)<sup>a</sup> for clinical response to treatment according to *HLA-G* 3'UTR polymorphisms (additive model) and UTR-1 haplotype.

| Alias                    | SNP rs     | CR                       |                 |                                            | CR+PR            |                 |                                            |
|--------------------------|------------|--------------------------|-----------------|--------------------------------------------|------------------|-----------------|--------------------------------------------|
|                          |            | HR (95%CI)               | <i>p</i> -value | <i>p</i> -value <sub>BH</sub> <sup>b</sup> | HR (95%CI)       | <i>p</i> -value | <i>p</i> -value <sub>BH</sub> <sup>b</sup> |
| +2960 Del/Insrs371194629 |            | <b>0.41 (0.21-0.78)</b>  | <b>0.0070</b>   | <b>0.0138</b>                              | 0.91 (0.69-1.19) | 0.4809          | 0.7449                                     |
| +3003 T>C                | rs1707     | 1.35 (0.57-3.18)         | 0.4972          | 0.4972                                     | 0.94 (0.64-1.37) | 0.7310          | 0.7449                                     |
| +3010 C>G                | rs1710     | <b>3.30 (1.61-6.77)</b>  | <b>0.0011</b>   | <b>0.0039</b>                              | 1.10 (0.84-1.46) | 0.4848          | 0.7449                                     |
| +3027 C>A                | rs17179101 | -                        | -               | -                                          | 1.22 (0.68-2.19) | 0.5099          | 0.7449                                     |
| +3035 C>T                | rs17179108 | -                        | -               | -                                          | 0.93 (0.62-1.39) | 0.7336          | 0.7449                                     |
| +3187 A>G                | rs9380142  | <b>2.94 (1.33-6.51)</b>  | <b>0.0079</b>   | <b>0.0138</b>                              | 1.16 (0.85-1.60) | 0.3528          | 0.7449                                     |
| +3196 C>G                | rs1610696  | 0.60 (0.28-1.28)         | 0.1896          | 0.2654                                     | 0.92 (0.67-1.25) | 0.5733          | 0.7449                                     |
| Haplotype                | Patients   | CR                       |                 |                                            | CR+PR            |                 |                                            |
|                          |            | HR (95%CI)               | <i>p</i> -value | <i>p</i> -value <sub>BH</sub> <sup>b</sup> | HR (95%CI)       | <i>p</i> -value | <i>p</i> -value <sub>BH</sub> <sup>b</sup> |
| UTR-1                    |            |                          |                 |                                            |                  |                 |                                            |
| 0                        | 120        | Reference                |                 |                                            | Reference        |                 |                                            |
| 1 copy                   | 99         | 1.71 (0.55-5.31)         | 0.3522          | 0.4109                                     | 0.93 (0.62-1.41) | 0.7449          | 0.7449                                     |
| 2 copies                 | 17         | <b>8.64 (2.47-30.28)</b> | <b>0.0007</b>   | <b>0.0039</b>                              | 1.80 (0.95-3.43) | 0.0709          | 0.6381                                     |

Associations with *p*-value <0.05 are evidenced in bold.

<sup>a</sup> Estimated from unconditional logistic regression model, adjusting for gender, age, site, stage at diagnosis, radical surgery, adjuvant treatment, and number of metastatic sites. <sup>b</sup> Corrected for multiple comparisons according to Benjamini-Hochberg method.

**Table S4.** Univariate hazard ratio (HR) and corresponding 95% confidence intervals (CI)<sup>a</sup> for death or progression according to *HLA-G* 3'UTR polymorphisms (additive model) and to the most frequent haplotypes in patients with complete or partial response.

| SNP           | Overall survival  |                 |                                            | Progression-free survival |                   |                                            |
|---------------|-------------------|-----------------|--------------------------------------------|---------------------------|-------------------|--------------------------------------------|
|               | HR (95% CI)       | <i>p</i> -value | <i>p</i> -value <sub>BH</sub> <sup>b</sup> | HR (95% CI)               | <i>p</i> -value   | <i>p</i> -value <sub>BH</sub> <sup>b</sup> |
| +2960 Del/Ins | 1.12 (0.71-1.76)  | 0.6274          | 0.6274                                     | 1.04 (0.72-1.51)          | 0.8276            | 0.8276                                     |
| +3003 T>C     | 0.65 (0.31-1.37)  | 0.2614          | 0.5329                                     | 0.71 (0.39-1.28)          | 0.2586            | 0.4526                                     |
| +3010 C>G     | 1.16 (0.76-1.77)  | 0.4850          | 0.6091                                     | 1.23 (0.87-1.74)          | 0.2361            | 0.4526                                     |
| +3027 C>A     | 1.65 (0.64-4.28)  | 0.3045          | 0.5329                                     | 1.38 (0.62-3.07)          | 0.4283            | 0.5996                                     |
| +3035 C>T     | 1.88 (1.00-3.54)  | <b>0.0498</b>   | 0.3486                                     | 1.46 (0.84-2.53)          | 0.1806            | 0.4526                                     |
| +3187 A>G     | 1.50 (0.91-2.48)  | 0.1094          | 0.3829                                     | 1.45 (0.98-2.16)          | 0.0661            | 0.4526                                     |
| +3196 C>G     | 0.83 (0.47-1.46)  | 0.5221          | 0.6091                                     | 0.87 (0.55-1.38)          | 0.5517            | 0.6437                                     |
| Haplotype     | Overall survival  |                 |                                            | Progression-free survival |                   |                                            |
|               | HR (95% CI)       | <i>p</i> -value | <i>p</i> -value <sub>BH</sub> <sup>b</sup> | HR (95% CI)               | <i>p</i> -value   | <i>p</i> -value <sub>BH</sub> <sup>b</sup> |
| UTR-1         |                   |                 |                                            |                           |                   |                                            |
| 0             | Reference         |                 |                                            | Reference                 |                   |                                            |
| 1 copy        | 1.22 (0.60-2.50)  | 0.5821          | 0.7900                                     | 1.39 (0.78-2.48)          | 0.2610            | 0.7084                                     |
| 2 copies      | 2.72 (0.97-7.59)  | 0.0562          | 0.3468                                     | 2.19 (0.93-5.17)          | 0.0743            | 0.2823                                     |
| 1 + 2 copies  | 1.43 (0.74-2.77)  | 0.2901          | 0.6428                                     | 1.52 (0.88-2.61)          | 0.1305            | 0.4133                                     |
| UTR-2         |                   |                 |                                            |                           |                   |                                            |
| 0             | Reference         |                 |                                            | Reference                 |                   |                                            |
| 1 copy        | 0.91 (0.47-1.75)  | 0.7678          | 0.8143                                     | 0.92 (0.53-1.57)          | 0.7468            | 0.8347                                     |
| 2 copy        | 0.47 (0.06-3.57)  | 0.4680          | 0.6904                                     | 0.63 (0.15-2.67)          | 0.5337            | 0.7244                                     |
| 1 + 2 copies  | 0.86 (0.45-1.65)  | 0.6582          | 0.7972                                     | 0.89 (0.52-1.51)          | 0.6561            | 0.7791                                     |
| UTR-3         |                   |                 |                                            |                           |                   |                                            |
| 0             | Reference         |                 |                                            | Reference                 |                   |                                            |
| 1 copy        | 0.38 (0.14-1.09)  | 0.0730          | 0.3468                                     | 0.47 (0.21-1.04)          | 0.0630            | 0.2823                                     |
| 2 copies      | 0.48 (0.07-3.55)  | 0.4724          | 0.6904                                     | 0.36 (0.05-2.59)          | 0.3077            | 0.7244                                     |
| 1 + 2 copies  | 0.40 (0.16-1.04)  | 0.0588          | 0.3468                                     | 0.45 (0.21-0.963)         | <b>0.0387</b>     | 0.2451                                     |
| UTR-4         |                   |                 |                                            |                           |                   |                                            |
| 0             | Reference         |                 |                                            | Reference                 |                   |                                            |
| 1 copy        | 0.84 (0.36-1.92)  | 0.6713          | 0.7972                                     | 0.93 (0.48-1.81)          | 0.8249            | 0.8707                                     |
| 2 copies      | -                 | -               | -                                          | -                         | -                 | -                                          |
| 1 + 2 copies  | 0.70 (0.31-1.60)  | 0.4001          | 0.6904                                     | 0.78 (0.40-1.51)          | 0.4609            | 0.7244                                     |
| UTR-5         |                   |                 |                                            |                           |                   |                                            |
| 0             | Reference         |                 |                                            | Reference                 |                   |                                            |
| 1 copy        | 1.55 (0.55-4.43)  | 0.4092          | 0.6904                                     | 1.31 (0.52-3.29)          | 0.5719            | 0.7244                                     |
| 2 copies      | 3.30 (0.4-24.67)  | 0.2445          | 0.6428                                     | 2.03 (0.28-14.85)         | 0.4847            | 0.7244                                     |
| 1 + 2 copies  | 1.74 (0.67-4.94)  | 0.2544          | 0.6428                                     | 1.39 (0.59-3.26)          | 0.4504            | 0.7244                                     |
| UTR-6         |                   |                 |                                            |                           |                   |                                            |
| 0             | Reference         |                 |                                            | Reference                 |                   |                                            |
| 1 copy        | 9.50 (2.10-43.09) | <b>0.0035</b>   | 0.0665                                     | 8.55 (3.22-22.72)         | <b>&lt;0.0001</b> | <b>0.0004</b>                              |
| 2 copies      | 0.74 (0.10-5.62)  | 0.7714          | 0.8143                                     | 0.56 (0.08-4.16)          | 0.5713            | 0.7244                                     |
| 1 + 2 copies  | 2.00 (0.60-6.72)  | 0.2626          | 0.6428                                     | 2.61 (1.10-6.21)          | <b>0.0294</b>     | 0.2451                                     |
| UTR-7         |                   |                 |                                            |                           |                   |                                            |
| 0             | Reference         |                 |                                            | Reference                 |                   |                                            |
| 1 copy        | 1.65 (0.64-4.28)  | 0.3045          | 0.6428                                     | 1.38 (0.62-3.07)          | 0.4283            | 0.7244                                     |

Associations with *p*-value <0.05 are evidenced in bold.

<sup>a</sup> Estimated from Cox proportional hazards model. <sup>b</sup> Corrected for multiple comparisons according to Benjamini-Hochberg method. Significant associations (*p*<0.05) were reported in bold.
